# Supplementary material for: Stathmin Is Dispensable for Tumor Onset in Mice
Source: PubMed Central journal article supplement (PMC3447788; doi:10.1371/journal.pone.0045561), 2012-09-20
Supplement: pone.0045561.s001.pdf [file pone.0045561.s001.pdf]

**A****Dyrskjot Bladder 3 Statistics**

Over-expression Gene Rank: 299 (in top 3%) P-value: 0.011  
 Reporter:  t-Test: 3.127  
 Fold Change: 1.396

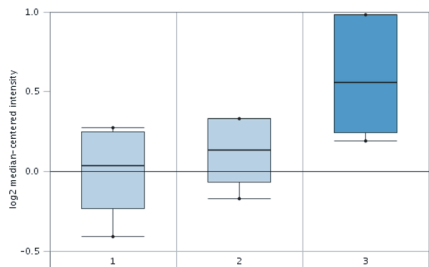

**Legend**  
 1. Bladder (9) 3. Stage 0Is Bladder Urothelial Carcinoma (5)  
 2. Bladder Mucosa (5)

**Dyrskjot Bladder 3**

Cancer Res 2004/06/01 60 samples STMN1 Information  
 mRNA 12,624 measured genes Reporter Information  
 Human Genome U133A Array

**Dyrskjot Bladder 3 Statistics**

Over-expression Gene Rank: 496 (in top 4%) P-value: 3.22E-7  
 Reporter:  t-Test: 6.007  
 Fold Change: 1.498

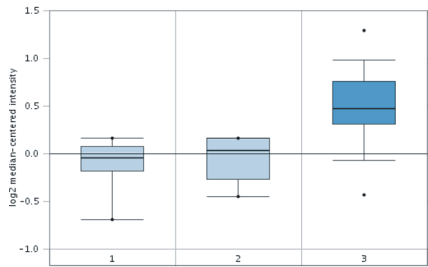

**Legend**  
 1. Bladder (9) 3. Superficial Bladder Cancer (28)  
 2. Bladder Mucosa (5)

**Dyrskjot Bladder 3**

Cancer Res 2004/06/01 60 samples STMN1 Information  
 mRNA 12,624 measured genes Reporter Information  
 Human Genome U133A Array

**Dyrskjot Bladder 3 Statistics**

Over-expression Gene Rank: 113 (in top 1%) P-value: 1.86E-7  
 Reporter:  t-Test: 7.090  
 Fold Change: 1.738

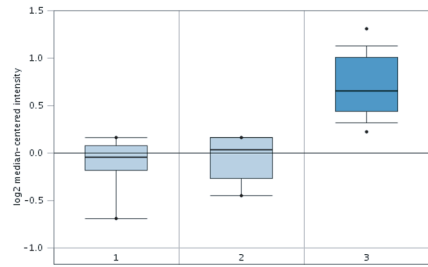

**Legend**  
 1. Bladder (9) 3. Infiltrating Bladder Urothelial Carcinoma (13)  
 2. Bladder Mucosa (5)

**Dyrskjot Bladder 3**

Cancer Res 2004/06/01 60 samples STMN1 Information  
 mRNA 12,624 measured genes Reporter Information  
 Human Genome U133A Array

**B****Sanchez-Carbayo Bladder 2 Statistics**

Over-expression Gene Rank: 239 (in top 2%) P-value: 1.76E-12  
 Reporter:  t-Test: 8.252  
 Fold Change: 2.842

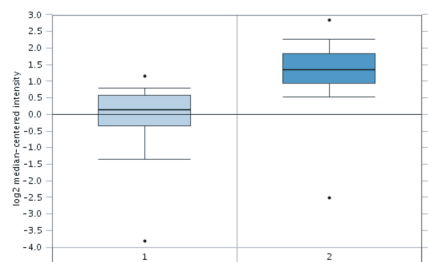

**Legend**  
 1. Bladder (48) 2. Infiltrating Bladder Urothelial Carcinoma (81)

**Sanchez-Carbayo Bladder 2**

J Clin Oncol 2006/02/10 157 samples STMN1 Information  
 mRNA 12,624 measured genes Reporter Information  
 Human Genome U133A Array

**C****Detwiller Sarcoma Statistics**

Over-expression Gene Rank: 172 (in top 2%) P-value: 7.31E-6  
 Reporter:  t-Test: 5.718  
 Fold Change: 4.033

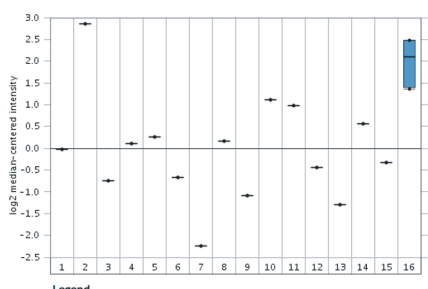

**Legend**  
 1. Adrenal Gland (1) 9. Pancreas (1)  
 2. Brain (1) 10. Prostate Gland (1)  
 3. Colon (1) 11. Skeletal Muscle Tissue (1)  
 4. Connective Tissue (1) 12. Skin (1)  
 5. Heart (1) 13. Small Intestine (1)  
 6. Kidney (1) 14. Spleen (1)  
 7. Liver (1) 15. Stomach (1)  
 8. Lung (1) 16. Fibrosarcoma (7)

**Detwiller Sarcoma**

Cancer Res 2005/07/01 54 samples STMN1 Information  
 mRNA 12,624 measured genes Reporter Information  
 Human Genome U133A Array

**Detwiller Sarcoma Statistics**

Over-expression Gene Rank: 109 (in top 1%) P-value: 1.77E-5  
 Reporter:  t-Test: 5.885  
 Fold Change: 4.207

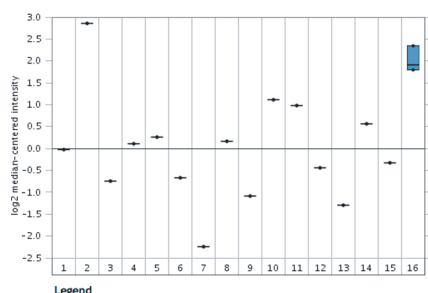

**Legend**  
 1. Adrenal Gland (1) 9. Pancreas (1)  
 2. Brain (1) 10. Prostate Gland (1)  
 3. Colon (1) 11. Skeletal Muscle Tissue (1)  
 4. Connective Tissue (1) 12. Skin (1)  
 5. Heart (1) 13. Small Intestine (1)  
 6. Kidney (1) 14. Spleen (1)  
 7. Liver (1) 15. Stomach (1)  
 8. Lung (1) 16. Pleomorphic Liposarcoma (3)

**Detwiller Sarcoma**

Cancer Res 2005/07/01 54 samples STMN1 Information  
 mRNA 12,624 measured genes Reporter Information  
 Human Genome U133A Array

**D****Barretina Sarcoma Statistics**

Over-expression Gene Rank: 46 (in top 1%) P-value: 7.22E-15  
 Reporter:  t-Test: 15.781  
 Fold Change: 3.204

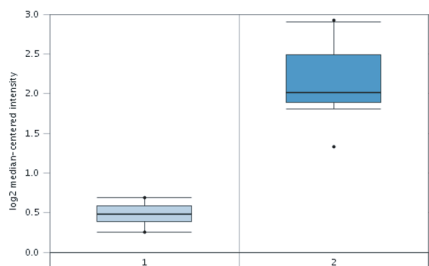

**Legend**  
 1. Adipose Tissue (9) 2. Myxoid/Round Cell Liposarcoma (20)

**Barretina Sarcoma**

Nat Genet 2010/07/04 158 samples STMN1 Information  
 mRNA 12,624 measured genes Reporter Information  
 Human Genome U133A Array

**Barretina Sarcoma Statistics**

Over-expression Gene Rank: 134 (in top 2%) P-value: 2.60E-10  
 Reporter:  t-Test: 9.426  
 Fold Change: 2.343

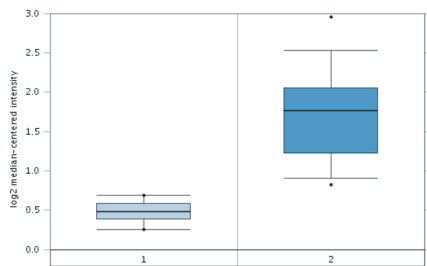

**Legend**  
 1. Adipose Tissue (9) 2. Pleomorphic Liposarcoma (23)

**Barretina Sarcoma**

Nat Genet 2010/07/04 158 samples STMN1 Information  
 mRNA 12,624 measured genes Reporter Information  
 Human Genome U133A Array

**Barretina Sarcoma Statistics**

Over-expression Gene Rank: 158 (in top 2%) P-value: 6.10E-13  
 Reporter:  t-Test: 10.531  
 Fold Change: 2.426

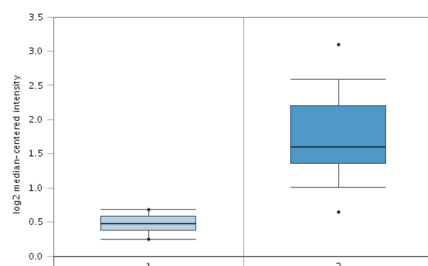

**Legend**  
 1. Adipose Tissue (9) 2. Myxofibrosarcoma (31)

**Barretina Sarcoma**

Nat Genet 2010/07/04 158 samples STMN1 Information  
 mRNA 12,624 measured genes Reporter Information  
 Human Genome U133A Array
